# Supplementary material for: The significance of coastal bathymetry representation for modelling the tidal response to mean sea level rise in the German Bight
Source: Copernicus journal article supplement (doi:10.5194/os-16-31-2020), 2020-01-07
Supplement: Supplementary file 1 [file os-16-31-2020-supplement.pdf]

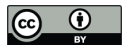

## *Supplement of*

# **The significance of coastal bathymetry representation for modelling the tidal response to mean sea level rise in the German Bight**

**Caroline Rasquin et al.**

*Correspondence to:* Caroline Rasquin ([caroline.rasquin@baw.de](mailto:caroline.rasquin@baw.de))

The copyright of individual parts of the supplement might differ from the CC BY 4.0 License.

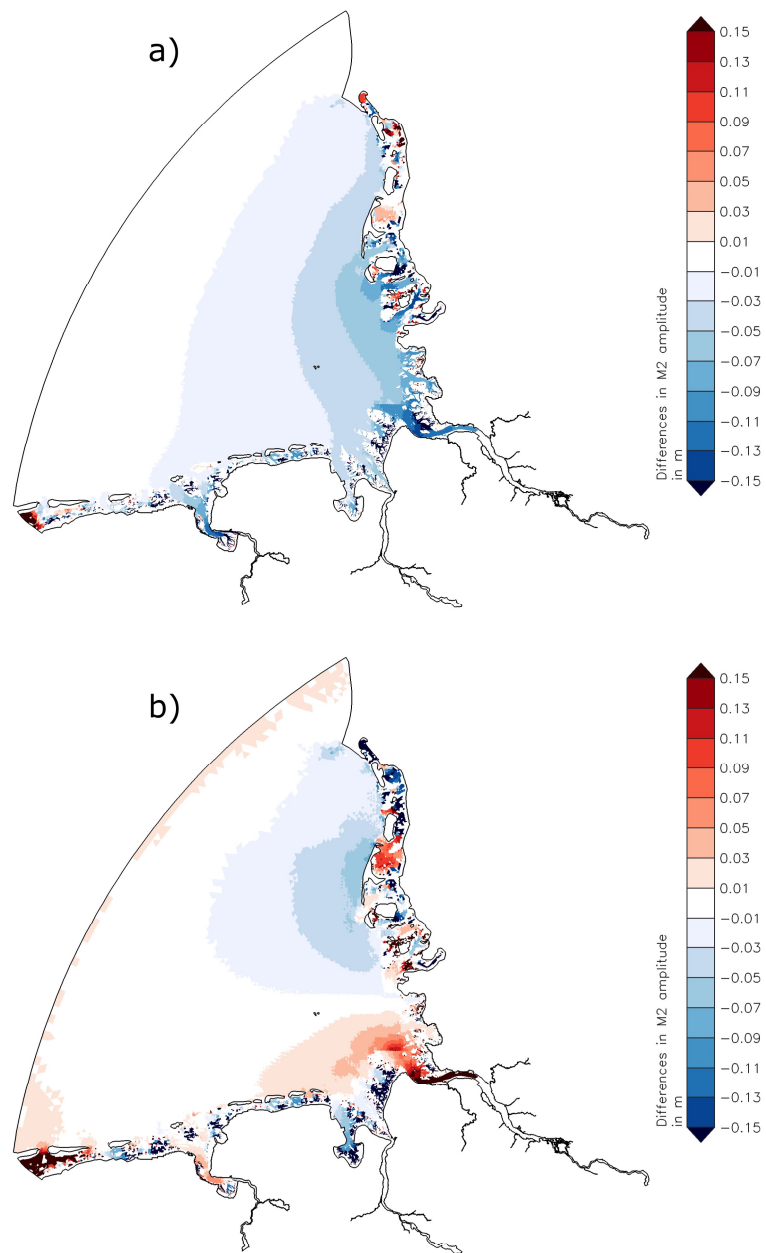

Figure S1: Changes in M2 amplitude. a) (GBM\_80-GBM\_ref)-(Shelf\_80-Shelf\_ref), b) (GBM\_1000-GBM\_ref)-(Shelf\_1000-Shelf\_ref)

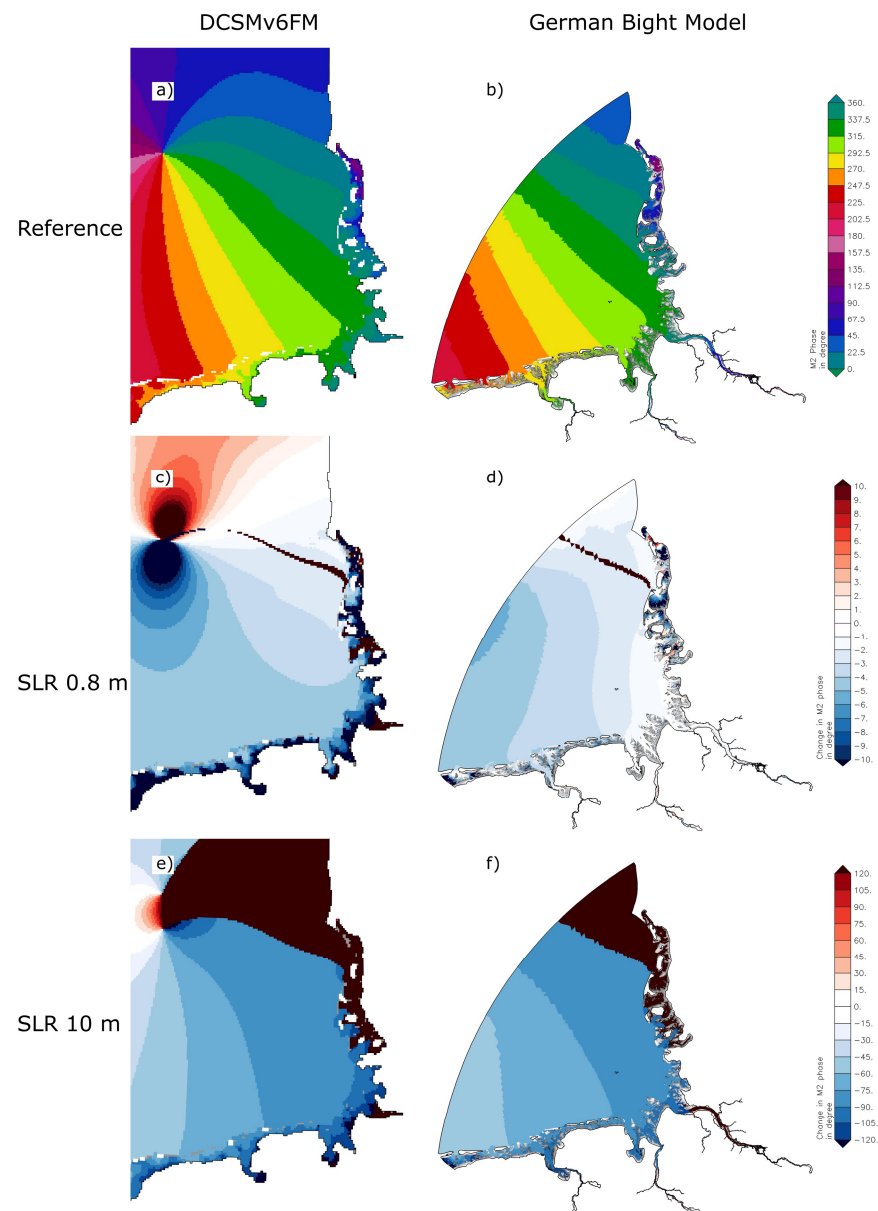

Figure S2: M2 phase lag and response of M2 phase lag to MSLR. Left: DCSMv6FM (a,c,e), right: German Bight Model (b,d,f), first row: Reference, second row: MSLR of 0.8 m, third row: MSLR of 10 m.
